# Supplementary material for: Improved Activity against Acute Myeloid Leukemia with Chimeric Antigen Receptor (CAR)-NK-92 Cells Designed to Target CD123
Source: MDPI journal article supplement (doi:10.3390/v13071365), 2021-07-14
Supplement: s1 [file s1]

## Supplementary Materials

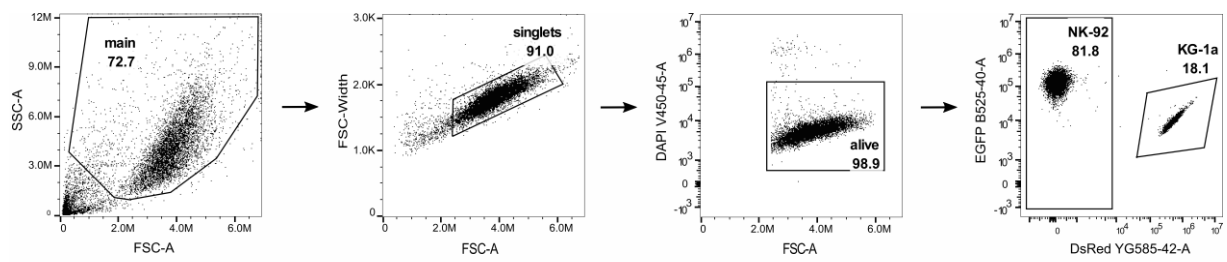

**Figure S1.** Representative dot plots showing a typical co-culture experiment. Cell populations were gated for singlets and vital cells were gated based upon the DAPI (4',6-diamidino-2-phenylindole) negative sub-population according to cells that were killed by heating (90 °C, 5 minutes). NK-92 cells and KG-1a cells were separated based on EGFP and DsRed expression, respectively.
